# Supplementary material
Source: publisher figshare collection journal article supplement (https://geolsoc.figshare.com/ndownloader/files/5426924)
Supplement: Supplementary file 1 [file 5426924]

				Kfel	Plag	Quartz	Cpx	Hb	Bt	Mag	Chlor	Ep
Porphyryitic	Hb Qz Monzonite	Nh 411	99	33	28	14		21	3	0			Reinhard & Wenk 1951
Medium grained	Hb Bt Granodiorite	Wk 66	99	24	26	13		33	4	1			Reinhard & Wenk 1951
Porphyritic	Adamellite	NB 9385	100	34	34	12		17	2	1			Kirk 1968
